# Supplementary material
Source: Springer Nature journal article supplement (https://www.springermedizin.de/resource/supplementary/12943_2009_645_MOESM11_ESM.pdf/9554474)

A549

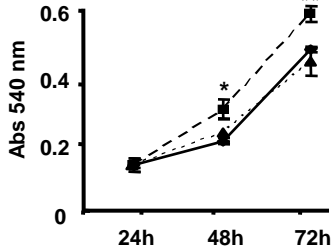

Irigoyen et al Figure 2

H1299

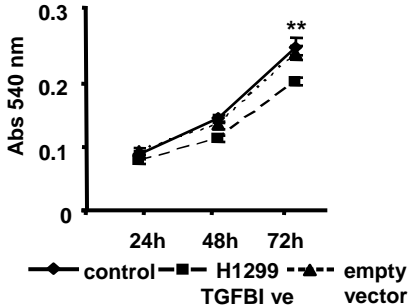

Supplement: MOESM11 [file 9554474]
